# Supplementary material for: Rational design of a highly reactive dicysteine peptide tag for fluorogenic protein labelling
Source: Royal Society of Chemistry journal article supplement (doi:10.1039/c8ob01417e), 2018-01-01
Supplement: c8ob01417e2.xlsx [file c8ob01417e2.xlsx]

## Sheet: Sheet1
At pH =	7.4		Bronsted slope =	0.4				Ideal pKa :	7.2
[H+] =	3.98107e-08							Max V rel :	0.509985
pKa	Ka	f RS-	pKa-pH	k2 rel	Norm. k2 rel	V rel
3	0.001	0.99996	-4.4	0.017378	0.000630957	0.0173773
3.1	0.000794328	0.99995	-4.3	0.0190546	0.000691831	0.0190537
3.2	0.000630957	0.999937	-4.2	0.020893	0.000758578	0.0208916
3.3	0.000501187	0.999921	-4.1	0.0229087	0.000831764	0.0229069
3.4	0.000398107	0.9999	-4	0.0251189	0.000912011	0.0251164
3.5	0.000316228	0.999874	-3.9	0.0275423	0.001	0.0275388
3.6	0.000251189	0.999842	-3.8	0.0301995	0.00109648	0.0301947
3.7	0.000199526	0.999801	-3.7	0.0331131	0.00120226	0.0331065
3.8	0.000158489	0.999749	-3.6	0.0363078	0.00131826	0.0362987
3.9	0.000125893	0.999684	-3.5	0.0398107	0.00144544	0.0397981
4	0.0001	0.999602	-3.4	0.0436516	0.00158489	0.0436342
4.1	7.94328e-05	0.999499	-3.3	0.047863	0.0017378	0.047839
4.2	6.30957e-05	0.999369	-3.2	0.0524807	0.00190546	0.0524477
4.3	5.01187e-05	0.999206	-3.1	0.057544	0.0020893	0.0574983
4.4	3.98107e-05	0.999001	-3	0.0630957	0.00229087	0.0630327
4.5	3.16228e-05	0.998743	-2.9	0.0691831	0.00251189	0.0690961
4.6	2.51189e-05	0.998418	-2.8	0.0758578	0.00275423	0.0757377
4.7	1.99526e-05	0.998009	-2.7	0.0831764	0.00301995	0.0830107
4.8	1.58489e-05	0.997494	-2.6	0.0912011	0.00331131	0.0909726
4.9	1.25893e-05	0.996848	-2.5	0.1	0.00363078	0.0996848
5	1e-05	0.996035	-2.4	0.109648	0.00398107	0.109213
5.1	7.94328e-06	0.995013	-2.3	0.120226	0.00436516	0.119627
5.2	6.30957e-06	0.99373	-2.2	0.131826	0.0047863	0.130999
5.3	5.01187e-06	0.992119	-2.1	0.144544	0.00524807	0.143405
5.4	3.98107e-06	0.990099	-2	0.158489	0.0057544	0.15692
5.5	3.16228e-06	0.987567	-1.9	0.17378	0.00630957	0.17162
5.6	2.51189e-06	0.984398	-1.8	0.190546	0.00691831	0.187573
5.7	1.99526e-06	0.980438	-1.7	0.20893	0.00758578	0.204842
5.8	1.58489e-06	0.975497	-1.6	0.229087	0.00831764	0.223473
5.9	1.25893e-06	0.969347	-1.5	0.251189	0.00912011	0.243489
6	1e-06	0.961713	-1.4	0.275423	0.01	0.264878
6.1	7.94328e-07	0.952273	-1.3	0.301995	0.0109648	0.287582
6.2	6.30957e-07	0.940649	-1.2	0.331131	0.0120226	0.311478
6.3	5.01187e-07	0.926412	-1.1	0.363078	0.0131826	0.33636
6.4	3.98107e-07	0.909091	-1	0.398107	0.0144544	0.361916
6.5	3.16228e-07	0.888184	-0.9	0.436516	0.0158489	0.387706
6.6	2.51189e-07	0.863193	-0.8	0.47863	0.017378	0.41315
6.7	1.99526e-07	0.833662	-0.7	0.524807	0.0190546	0.437512
6.8	1.58489e-07	0.79924	-0.6	0.57544	0.020893	0.459915
6.9	1.25893e-07	0.759747	-0.5	0.630957	0.0229087	0.479368
7	1e-07	0.715253	-0.4	0.691831	0.0251189	0.494834
7.1	7.94328e-08	0.666139	-0.3	0.758578	0.0275423	0.505318
7.2	6.30957e-08	0.613137	-0.2	0.831764	0.0301995	0.509985
7.3	5.01187e-08	0.557312	-0.1	0.912011	0.0331131	0.508274
7.4	3.98107e-08	0.5	0	1	0.0363078	0.5
7.5	3.16228e-08	0.442688	0.1	1.09648	0.0398107	0.485398
7.6	2.51189e-08	0.386863	0.2	1.20226	0.0436516	0.465112
7.7	1.99526e-08	0.333861	0.3	1.31826	0.047863	0.440114
7.8	1.58489e-08	0.284747	0.4	1.44544	0.0524807	0.411585
7.9	1.25893e-08	0.240253	0.5	1.58489	0.057544	0.380775
8	1e-08	0.20076	0.6	1.7378	0.0630957	0.348881
8.1	7.94328e-09	0.166338	0.7	1.90546	0.0691831	0.31695
8.2	6.30957e-09	0.136807	0.8	2.0893	0.0758578	0.28583
8.3	5.01187e-09	0.111816	0.9	2.29087	0.0831764	0.256155
8.4	3.98107e-09	0.0909091	1	2.51189	0.0912011	0.228353
8.5	3.16228e-09	0.0735876	1.1	2.75423	0.1	0.202677
8.6	2.51189e-09	0.0593509	1.2	3.01995	0.109648	0.179237
8.7	1.99526e-09	0.0477267	1.3	3.31131	0.120226	0.158038
8.8	1.58489e-09	0.0382865	1.4	3.63078	0.131826	0.13901
8.9	1.25893e-09	0.0306534	1.5	3.98107	0.144544	0.122034
9	1e-09	0.0245034	1.6	4.36516	0.158489	0.106961
9.1	7.94328e-10	0.0195623	1.7	4.7863	0.17378	0.0936311
9.2	6.30957e-10	0.0156017	1.8	5.24807	0.190546	0.0818787
9.3	5.01187e-10	0.0124327	1.9	5.7544	0.20893	0.0715429
9.4	3.98107e-10	0.00990099	2	6.30957	0.229087	0.062471
9.5	3.16228e-10	0.00788068	2.1	6.91831	0.251189	0.054521
9.6	2.51189e-10	0.00627001	2.2	7.58578	0.275423	0.0475629
9.7	1.99526e-10	0.00498688	2.3	8.31764	0.301995	0.0414791
9.8	1.58489e-10	0.00396529	2.4	9.12011	0.331131	0.0361638
9.9	1.25893e-10	0.00315231	2.5	10	0.363078	0.0315231
10	1e-10	0.00250559	2.6	10.9648	0.398107	0.0274733
10.1	7.94328e-11	0.00199129	2.7	12.0226	0.436516	0.0239406
10.2	6.30957e-11	0.00158239	2.8	13.1826	0.47863	0.0208599
10.3	5.01187e-11	0.00125734	2.9	14.4544	0.524807	0.0181741
10.4	3.98107e-11	0.000999001	3	15.8489	0.57544	0.0158331
10.5	3.16228e-11	0.000793698	3.1	17.378	0.630957	0.0137929
10.6	2.51189e-11	0.000630559	3.2	19.0546	0.691831	0.0120151
10.7	1.99526e-11	0.000500936	3.3	20.893	0.758578	0.010466
10.8	1.58489e-11	0.000397949	3.4	22.9087	0.831764	0.00911648
10.9	1.25893e-11	0.000316128	3.5	25.1189	0.912011	0.00794077
11	1e-11	0.000251126	3.6	27.5423	1	0.00691657
